# Supplementary material for: Two-step controllable preparation of NiO nanocrystal anchored reduced graphene oxide sheets and their electrochemical performance as supercapacitors
Source: Royal Society of Chemistry journal article supplement (doi:10.1039/c7nj02267k), 2017-01-01
Supplement: c7nj02267k1.pdf [file c7nj02267k1.pdf]

Electronic Supplementary Information (ESI)

Two-step controllable preparation of NiO nanocrystals anchored reduced graphene oxide sheets and their electrochemical performance for supercapacitors

Jun Gui, Jinhua Zhang, Tianbao Liu, Yanfen Peng, Jie Chang\*

Chizhou University, College of Chemistry and Materials Engineering, Anhui, Chizhou, 247000

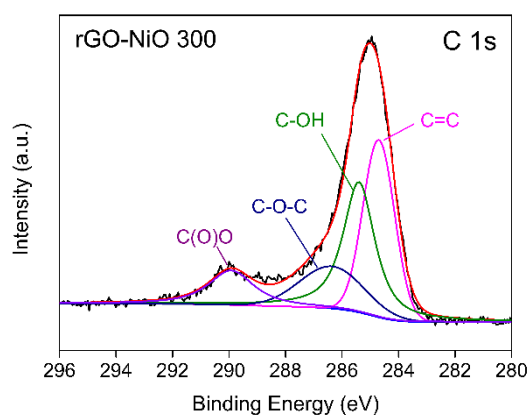

Figure S1 High resolution XPS of C 1s of rGO-NiO 300

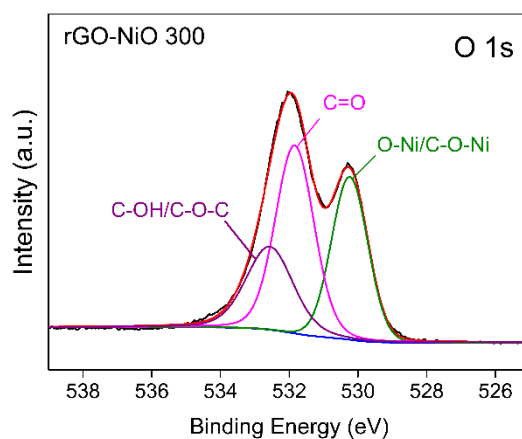

Figure S2 High resolution XPS of O 1s of rGO-NiO 300

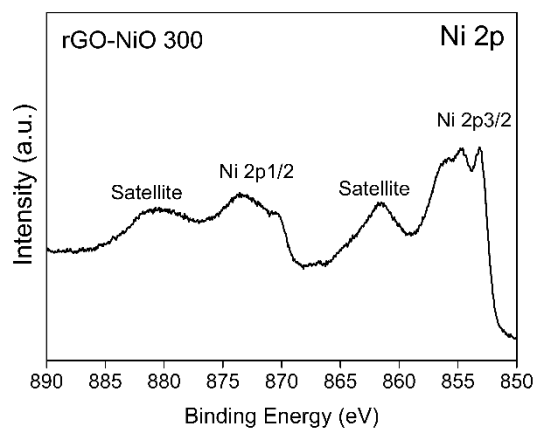

Figure S3 High resolution XPS of Ni 2p of rGO-NiO 300
